# Supplementary material for: Evolution of the Noncoding Features of Sea Snake Mitochondrial Genomes within Elapidae
Source: MDPI journal article supplement (doi:10.3390/genes13081470), 2022-08-17
Supplement: s1 [file s1]

ACTCTCCGCAAGTGGCTTTT--AAGAGCCACTGGTTACACTTCAAGTCCATCTCAAGGCGCGGACCA--CATCTCCCTCTCTAGCTTTTCCAAAGCCCTTTGGTGCGAACCGGTTATATGGTGACATACACCTCATGTCTTT--ATACAGC--TGCAGCATGT  
 ACTCTCTCCAGAGTGCCTTT--AAGAGCCACTGGTTACACTTCAAGTCCATCTCAAGGCGCGGACCACTCTCCCTACTAGCTTTTCCAAAGCCCTTTGGTGCGAACCGGTTATATGGTGACATACACCTCATGTCTTT--ATACAGC--TGCAGCATGT  
 ACTCTCTCCGCAAGTGGCTTTT--AAGAGCCACTGGTTACACTTCAAGTCCATCTCAAGGCGCGGACCACTCTCCCTACTAGCTTTTCCAAAGCCCTTTGGTGCGAACCGGTTATATGGTGACATACACCTCATGTCTTT--ATACAGC--TGCAGCATGT  
 ACCCTCTCCAGTGTGACTTT--AAGAGCCACTGGTTACACTTCAAGTCCATCTCAAGGCGCGGACCACTCCCGGCTCATAGCTTTTCCAAAGCCCTTTGGTGCGAACCGGTTATATGGTGACATACACCTCATGTCTTT--ATACAGC--TGCAGTGTAGTG  
 ACCCTCTCCAGTGTGACTTT--AAGAGCCACTGGTTACACTTCAAGTCCATCTCAAGGCGCGGACCACTCCCGGCTCATAGCTTTTCCAAAGCCCTTTGGTGCGAACCGGTTATATGGTGACATACACCTCATGTCTTT--ATACAGC--TGCAGTGTAGTG  
 ACCCTCTCCAGTGTGACTTT--AAGAGCCACTGGTTACACTTCAAGTCCATCTCAAGGCGCGGACCACTCCCGGCTCATAGCTTTTCCAAAGCCCTTTGGTGCGAACCGGTTATATGGTGACATACACCTCATGTCTTT--ATACAGC--TGCAGTGTAGTG  
 ACTCTCTCCAGTGTGACTTT--AAGAGCCACTGGTTACACTTCAAGTCCATCTCAAGGCGCGGACCACTCTCCCTACTAGCTTTTCCAAAGCCCTTTGGTGCGAACCGGTTATATGGTGACATACACCTCATGTCTTT--ATACAGTGTATGAGAAC  
 ACTCTCTCCGCAAGTGGCTTTT--AAGAGCCACTGGTTACACTTCAAGTCCATCTCAAGGCGCGGACCACTCTCCCTACTAGCTTTTCCAAAGCCCTTTGGTGCGAACCGGTTATATGGTGACATACACCTCATGTCTTT--ATACAGTGTATGAGAAC  
 ACTCTCCGCTTTATGTGTTT--AAGAGCCACTGGTTACACTTCAAGTCCATCTCAAGGCGCGGACCACTCCCGGCTCATAGCTTTTCCAAAGCCCTTTGGTGCGAACCGGTTATATGGTGACATACACCTCATGTCTTT--ATACAGTATGTCGAGTG  
 ACTCTCTCCGCTTTATGTGTTT--AAGAGCCACTGGTTACACTTCAAGTCCATCTCAAGGCGCGGACCACTCCCGGCTCATAGCTTTTCCAAAGCCCTTTGGTGCGAACCGGTTATATGGTGACATACACCTCATGTCTTT--ATACAGTATGTCGAGTG  
 ACTCTCTCCGCTTTATGTGTTT--AAGAGCCACTGGTTACACTTCAAGTCCATCTCAAGGCGCGGACCACTCCCGGCTCATAGCTTTTCCAAAGCCCTTTGGTGCGAACCGGTTATATGGTGACATACACCTCATGTCTTT--ATACAGTATGTCGAGTG  
 C--CCCTCTCTCTTGGCTTTT--CCAAAGCCGCTGGTTACACTTCAAGATCATCTCGAATGTCGGGACCACTCCCTCATACTAGCTTTTCCAAAGCCCTTTGGTGCGAACCGGTTATAT--TGTGACATATACACCTCATGTCTTG--ATACAGTATGTCGAGTG

TAATAAAATAATACGAGATTAAATATATAA---TATTTTAACCTCACTCAATTTTATTTTACCCCTGCATAAGATAGCAAAATAAATACAATTTATCTGCATTATAATTTAATTCCTGTTTTTATTATTATTTATTTCTAAAACTATTAAAGAAATATTA  
TAATAAAACAATACGAGATTGATATACAATA  
TTAATAAAACAAATACGAGATTAAATATATAAAAT  
TATGCGGAAATTAATAAATACTCTGAGCGCTATC  
ACCGATAAATTAAACTACCCCAACCCATCTTCAACCCATAACCCATGAACCAT

[--repeat sequence  
--TTATAAAATAATCGAGATTAAATATAAATATATTCTCCACCAGCCTCCTCCCAAAAAAAGGTACAAGCATGTTTCGTTCGATG  
AAATTTATCTCAGCGTATTATAGCTATTTTATCTTACTTATAAAACAATACGAGATTAAATATATAA--AAATTTTAACCTCACTCAATTTTATTTTACCCCTGCATAAGATAGCAAAATAAATACAATTTATCTGCATTATAATTTAATTCCTG  
TTTATTAAATAAATAGTAGCAGATTAAATATAAAATATTTAACTCACTCAATTTTATTTTCA--CCCTTCTACAAGATAGCAAAATAAAT  
TTTATTAAATAAATAGTAGCAGATTAAATATAAAATATTTAACTCACTCAATTTTATTTTCA--CCCTTCTACAAGATAGCAAAATAAAT  
ATTTTAACCTCACTCAATTTTATTTCAACCTCTCATTAAAGATAGCAAAATAAATATAATTTATCTGCATTATAATTTTATCTCCAGTTT  
TACGATACTGATTTTCTATAATAAATACCGTTCAAAATTTACTCTTGTGTAAAAATACTCCTACTATTTTAATGGTTTTTCGGTATCTATAT

TAATTTTTTATCCAGTTTTTACTATTATTAGTTCTAACAGCCTATTTAAAAATATTAAATTACTTCTCACACTACTATAGCATTTTTACCTTTAA} 10 tandem repeats of 190bp sequence  
GTTTTTATTATTATTATCTAAAACTATTAAAGAAATTTAAATCACTCTCAGCGTATTATAGCTATTTTATCTTTACTTTATAAAACAATACGAGATTAAATATATA} 8 tandem repeats of 197bp sequence  
TAGAATTTATCGCATTGTAGCTTTAATTCAGTTTATTATTAAAGTTTCTAAAACTATTAGGAATATTAAATTACTCTCGCGCTATTATAGCGATTTTAT} 13 tandem repeats of 198 bp sequence  
TAGAATTTATCGCATTGTAGCTTTAATTCAGTTTATTATTAAAGTTTCTAAAACTATTAGGAATATTAAATTACTCTCGCGCTATTATAGCGATTTTAT} 14 tandem repeats of 198 bp sequence  
TTATTATTGTTTATTCTAAAACTATTAAAGAAATTTAAATTATCTCACACTATTATTAGCGCTTTTATCTTTATTATAAAACAATACGAGATTAAATATATAAAAT} 4 tandem repeats of 199 bp sequence  
ATTACAATACTGATTTTTTATAATAAAAACTACTATAAAAAACCAATAAGACTTAGATAAATTTACGATAAAATAACCACTCCCCCTCAATAATTGTATTAAATGCAAAATCTTCCCCACTAATATAGTTATTTTATCCCATGCTTACAG} 2 tandem

->][-- tRNA-Phe ->]  
GTTATCA-TA-GCTT-ACAACC---AAGC-A-TAGCA-CTGAAAA--TGCTA-AGAC-GGC-CTT---ACC--TGATAACA--ACCCACAGTGAATAATGCTATTACAACCCATTATTAAATACAACACTAA

repeats of 241 bp sequence

AAACCGCCTACTTTATTGAAGTAGGTCTCTATTACATGGCTACTCAAATATCTTATACATTATCTCATGATCTAAGCAACCAACCTCTAACAAGCAATACGCGCATCATATAGTATTTTATAAAGACCGCACGTAAACCTACTCTTTATAN







[illegible][illegible]

( CSB-1 )

CTTTACCTGACAAACATATATGCCGTTACC-GTTACCCCT-ACCGGGGTGGACAACCT--AGTCGGGGTGGCGCTATTCTGTGCTTCGATATTCCTC-TATATGGATACA--TTCTCTCCATGATTTTAGACATA--TCGTCTCATTTGA  
CTTTACCTGACACACATATATGCTGTGTTACC-GTTACCCCT-ACCGGGGTGGACAACCTT-AGTCCGGGTGGCGCTAATTTCTGTGCTACGATCTTCCTC-TATAGAGTACA--TTCTCTCCATGTTTTAGACATA--TTTTCTCTGGCAC  
CTTTACCTGACACACCATATATGCCGCTTTACC-GTTACCCCT-ACCGGGGTGGACAACCTT-AGTCCGGGTGGCGCAATTTCTGTGCTACGATATTCCTC-TATAGAGTACA--TTCTCTCCAGTATTTTAGACATA--TTTTCTCTATGCC

CTTTCACTGACACCAATATATGCCCGGTATCC- GTTATCCCT- ACCGGGGGTAGACACTTT- AGTCACGGGTGGAGCTGATTTGTGGCTTCAGACATCC- TATATGGATACA- TCTCTT- CARGCTGTATAGACATA- TTTTCTCTCCGAC  
 TTTTCACTGACACCAATATATGCCCGGTATCC- GTTATCCCTCACTGGGGGTAGACATTT- AGTACAGAGTGGAGCTGATTTGTGGCTCAGACATATCC- TATATGGATACA- TCTCTT- CARGATTTATAGACATA- TTTTCTCTCTCTC  
 CTTTCACTGACACCAATATATGCCCGGTATCC- GTTATCCCTCACTGGGGGTAGACACTTT- AGTACAGAGTGGAGCTGATTTGTGGCTTCAGACATCC- TATATGGATACA- TCTCTT- CARGATTTATAGACATA- TTTTCTCTCCGAC  
 CTTTCACTGACACCAATATATGCCCGGTATCC- GTTATCCCT- ACCGGGGGTAGACACTTT- AGTCACGGGTGGAGCTGATTTGTGGCTCAGACATATCC- TATATGGATACA- TCTCTT- CARGCTGTGTAGAGACA- CGGTATCTCCATCT  
 CTTTCACTGACACCAATATATGCCCGGTATCC- GTTATCCCTCACTGGGGGTAGACACTTT- AGTACAGAGTGGAGCTGATTTGTGGCTCAGACATATCC- TATATGGATACA- TCTCTT- CARGATTTATAGACATA- TTTTCTCTCTCTC  
 CTTTCACTGACACCAAG- TATGCCCGGTATCC- GTTATCCCTCACTGGGGGTAGACACTTT- AGTCACGGGTGGAGCTGATTTGTGGCTCAGACATCC- TATATGGATACA- TCTCTT- CARGATTTATAGACATA- TTTATCTCTACAT  
 CTTTCACTGACACCAATATATGCCCGGTATCC- GTTATCCCT- ACCGGGGGTAGACATCTC- AGTCCGGGTGGAGCTAATTTGTGGCTAGACATATCC- TATATGGATACA- TTTCTT- CARGCTGTGTAGAGACA- TTTATCTTCACAT  
 CTTTCACTGACACCAATATATGCCCGGTATCC- GTTATCCCT- ACCGGGGGTAGACACTTT- AGTCCGGGTGGAGCTAATTTGTGGCTAGACATATCC- TATATGGATACA- TTTCTT- CARGCTGTGTAGAGACA- TTTATCTTCCGAC  
 CTTTCACTGACCACTCACTT- GCGGCTGATCC- GTTCTCCC- CACTGGGGGTAGACACTCACTGACGGGTGGAGCTAATTTGTGGCTCAGACATATCC- TATACGGATACA- TCTCTT- CARGCTGTGTAGAGACA- TTTTCTCTCTGAG  
 CTTTCACTGACACCAATATATGCCCGGTATCC- GTTATCCCTCACTGGGGGTAGACACTTT- AGTCACGGGTGGAGCTGATTTGTGGCTCAGACATCC- TATATGGATACA- TCTCTT- CARGATTTATAGACATA- TTTATCTCTACAC  
 CTTTCACTGACCACTCAATATATGACACACAGTTAGGATTTAGTCCG- GG- GTT- -AGACATA- TGTATGCTCTCCACCACTCCCTTGAAGGCTA- CA- -TCTC- TTAAGCTGTGTAGAGACA- TATCTTTTTCTCCG

[ CSB-3 ]

[illegible]

ATGTTATCTTTGAATACCCCTACATCACACTTAACATATTTAACCCGGGTTTCACACTTTTAACTCCTAAAAGCTATTAAAAATAAAAACTTCCCACTACGCTACTATAGCATTTTATCTTTAA-----  
 TATACCCCAACAGCCGCTTTATATATT-----  
 AACCCTACATCAACCCCCCCCCCATCTCTACATTTTAAATGGTTTTCGGATCTATATACAATCACTGAATTTTATAATAAAAA-----

[illegible]

TGGCTGATTTTATATAGTAATAA-  
 AGATTTTATATACAAAT-----  
 GAAATTCATATATAAAAAAT---  
 TTTTATATATAAAATTTATTTTACCTACCAAAATTAACAGCAAAAAATTCCTATAAAAATTATCTCTGAGAGATGATTTTACATTTTAAATTTTTTTTCTCTCAAAAAAGTGCCCAATTTCCCGCTGCTTTCAACACTATGCGGAGATTAATAATA  
 AATTGGAGACTATTTATATAAAA-  
 TATTGGCAGTCATAATACGGGGAATTTGTATACTGAATCTACAACAAAAAT-  
 ATGCTAAATTTCTTACAACATTATAACTTTCAACTTATATTTTAGCCCATAAAAGTACT-  
 ATCTCAAAATTTTATACAATTTTTPAAAAGCTTACTGTTAAAGGCATCAAAATATTAATTTCAATACTATATAATCTCAACAAAAACCCTTAATTTATTAACATAAA-  
 ATCTCAACACTCTCCCGAATTTTATATAA-  
 CTAAATCTCTGTAGTCTCAAAATTTTATATATA-  
 TTTCAACCAACACCGGAATTTCTATATAATTGCG-  
 GGAAAACCAACCTCTTAATCAGCATTTGACGTTTGCTTCTTATATAAATTACTCTTATCTACACACTCAAAAGCAAAATCCAACATCATCCACTTTCTCTACACACCCCAAAA-



[illegible]

TATAAACATATTCTATTAT-CACCTTTTT---ACTCTTCCCTTGAGAAGCAACACAATATATTTTAA--TTCCGAGTTTTTATTATTATAAATCTCAAAAATCTTCAGAATATTAAACCACCTCTCACACTATTATAGCGCTTTTATCTTTATTATATAAATATATTATTGT-CACCTTTTT---ACTCTTCCCTTGAGAAGTAACACAATANATTTTA--TTCCGAGTTTTTATTATTATTATTCTCAAAAATCTTAAGAATATTAAAAATCTCTCACACTATTATGGTGATTTTATCTTTATTATCTAATAATATATTCTCCACCTTTTTTTACTACTCCCCCGAAAAACAACAACAACATACTTTA-ATCCC-ATTTTATTATTATTAGGTACCTTAAAA-CTTAAGAACAATT--AAATCACTCTCACACTACTGTAATGATTCTATTCTTATCA

AG--GCAAGCAG-GCAGGCAGATT-----GAGTTGCTCACAGAATCACAGATTCATTCTAGAGATCTATCTATCTGCATCGGCT-AGCTCAGTCTGTACATAAAAATTGCTTGCAGCAAACTCA-----CAAAATTAATCT

[illegible][illegible]

Supplementary figure S3. Sequence comparison of the MNCR2 region among 21 snake species. The control region sequences were aligned with the aid of ClustalX software after identifying common sequence blocks (C-rich, CSB-1, CSB-3, and coreTAS sequences). Transfer RNA genes were aligned based on their clover-leaf secondary structures. The red line indicates the anticodon of each tRNA gene. Sequences for tandemly duplicated regions are represented by a single repetitive unit sequence with a note on repetitive numbers.

| scientific name                | Accession number | [+ tRNA-Ile →]                                                                              |
|--------------------------------|------------------|---------------------------------------------------------------------------------------------|
| 1. Emydocephalus ijimae        | LC648431         | GGAAGCG-TG-CCCG-AGC-----AAGG-A-CTACA-TTGATAG-AGTAG-ACAC--GGAG--ACCATAAA-----CTCC-CACCTTCCC  |
| 2. Hydrophis ornatus           | LC648430         | GGAAGCG-TG-CCCG-AGT-----AGGG-G-CTACA-TTGATAG-AGTAG-CCAC--GGAG--ACCGAAAA-----CTCC-CACCTTCCC  |
| 3. Hydrophis melanocephalus(1) | LC648429         | GGAAGTG-TG-CCCG-AGT-----AGGG-A-CTACA-TTGATAG-AGTAG-ACAC--GGAG--ACCGAAAA-----CTCC-CACCTTCCC  |
| 4. Hydrophis melanocephalus(2) | LC648429         | AGGAAGTG-TG-CCCG-AGT-----AGGG-A-CTACA-TTGATAG-AGTAG-ACAC--GGAG--ACCGAAAA-----CTCC-CACCTTCCC |
| 5. Hydrophis curtus            | MK953549         | GGAAGTG-TG-CCCG-AGT-----AAGG-G-CTACA-TTGATAG-AGTAG-ACAC--GGAG--ACCGAAAA-----CTCC-CACCTTCCC  |
| 6. Hydrophis platurus          | MK775530         | GGAAGCG-TG-CCCG-AGT-----AGGG-A-CTACA-TTGATAG-AGTAG-CCAC--GGAG--ACCGAAAA-----CTCC-CACCTTCCC  |
| 7. Hydrophis cyanocinctus      | NC046795         | GGAAGTG-TG-CCCG-AGT-----AGGG-A-CTACA-TTGATAG-AGTAG-ACAC--GGAG--ACCGAAAA-----CTCC-CACCTTCCC  |
| 8. Laticauda semifasciata      | KY496325         | AGGAAGCG-TG-CCCG-AATTA---AAGG-A-CTACC-TTGATAG-CGTAG-ACAT--GGAG--CTCCCTCA-----ACCA-CAACCAACA |
| 9. Laticauda colubrina         | KY496324         | GGAACCG-TG-CCCG-AGT-----AGGG-G-CTACC-TTGATAG-AGTAG-ACAC--GGAG--ACCAACAAA-----CTCC-CGCTTCCCT |
| 10. Laticauda laticaudata      | KY496323         | GGAAGCG-TG-CCCG-AGCA---AAGG-A-CTACA-CTGATAA-AGTAG-ACAC--GGAG--CCTATAAA-----CTCC-CGCTTCCC    |
| 11. Sinomicrurus japonicus     | LC648432         | GGAGGCG-TG-CCCG-AGCA---CAGG-G-CTACC-TTGATAG-AGTAG-ATAC--GGAA--CCCATAAA-----TTCC-CACCTTCCC   |
| 12. Sinomicrurus peianii       | MZ230594         | GAAGACG-TG-CCTG-AGT-----AAGG-A-CTACC-TTGATAG-AGTAG-ACAC--GGAA--CCCATAAA-----TTCC-CGCTTCCC   |
| 13. Sinomicrurus mecklelandi   | MT547176         | GGAGGTG-TG-CCTG-AGA---AAGG-A-CTACA-TTGATAA-AGTAG-ACAC--GGAG--CCATACCTCCAC-CTCC-CACCTTCCC    |
| 14. Micrurus fulvius           | GU045453         | GGAAGCG-TG-CCCG-AGAA---AAGG-A-CTACC-TTGATAG-CGTAG-ACAC--GGAG--CCATATAA-----CTCC-CGCTTCCC    |
| 16. Ophiophagus hannah         | EU921899         | GGAAGTG-TG-CCCG-AGT-----AAGG-A-CTACA-TTGATAG-CGTAG-ACAC--GGAG--CCCAAAA-----CTCC-CGCTTCCC    |
| 15. Naja atra                  | EU913475         | GGAAGCG-TG-CCTG-AGT-----AAGG-A-CTACC-TTGATAG-TGTAG-ACAC--GGAA--CCCAAAA-----TTCC-CGCTTCCC    |
| 18. Bungarus multicinctus      | EU579522         | GGAAGTG-TG-CCTG-AGT-----AAGG-A-CTACC-TTGATAG-CGTAG-ACAC--GGAA--CCCAATAA-----TTCC-CACCTTCCC  |
| 17. Bungarus fasciatus         | EU579523         | GGAAGTG-TG-CCCG-AGCT---AAGG-A-CTACC-TTGATAG-AGTAG-ACAC--GGAA--CCATATAA-----TTCC-CACCTTCCC   |
| 19. Lycodon semicarinatus      | AB008539         | GGGGGTG-TG-CCCG-AGT-----AGGG-A-CTACC-TTGATAG-AGTAG-ACAC--GGAA--CCATATAA-----CTCC-CACCTTCCC  |
| 20. Sibon nebulatus            | NC013985         | GGAAATG-TG-CCCG-AGTC---AAGG-A-CTACC-TTGATAG-AGTAG-ATAC--GGAA--CCATATAA-----CTCC-CACCTTCCC   |
| 21. Oviphis okinavensis        | AB175670         | GGAAGTG-TG-CCTG-AGAACAC-AAGG-A-CTACC-TTGATAG-AGTAG-ACAC--GGGA--ACCCACA-----ACCC-CACCTTCCC   |
| 22. Python regius              | AB177878         | GGAAGTG-TG-CCCG-AGAC---AGGG-A-TTACC-TTGATAG-AGTAA-ACAC--AGGA--TTACAA-----CCCT-CACCTTCCC     |

Supplementary figure S4. Sequence comparison of tRNA<sup>Ile</sup> genes among 21 snake species based on their clover-leaf secondary structures. *Hrdrophis melanocephalus* mtDNA encodes two copies of tRNA<sup>Ile</sup> genes (noted with 1 and 2) that correspond to I<sub>1</sub> and I<sub>2</sub> in Fig. 3, respectively. The red line indicates the anticodon.

| scientific name                | Accession number | [+ tRNA-Phe →]                                                                        |
|--------------------------------|------------------|---------------------------------------------------------------------------------------|
| 1. Hydrophis melanocephalus(1) | LC648429         | GTTATC-A-TA-GCTT-ACAACC---AAGC-A-TAGCA-CTGAAAA--TGCTA-AGAC-GGC-CCT---ACC--TGATAACA    |
| 2. Hydrophis melanocephalus(2) | LC648429         | GTTATC-A-TA-GCCC-TTATT---AAGC-G-CAGCA-CTGAAAA--TGCTA-AATT-ACC-CCA---ACT--TTATAACA     |
| 3. Hydrophis melanocephalus(3) | LC648429         | GTTATC-A-TA-GCCC-TTATT---GGG-G-CAGCA-CTGAAAA--TGCTA-AATT-ACC-CCA---ACT--TCATAACA      |
| 4. Hydrophis melanocephalus(4) | LC648429         | GTTATC-A-TA-GCCC-TTATT---AAGC-G-CAGCA-CTGAAAA--TGCTA-AATT-ACC-CCA---ACT--TCATAACA     |
| 5. Hydrophis melanocephalus(5) | LC648429         | GTTATC-A-TA-GCCC-TTATT---GGG-G-CAGCA-CTGAAAA--TGCTA-AATT-ACC-CCA---ACT--TCATAACA      |
| 6. Hydrophis melanocephalus(6) | LC648429         | GTTATC-A-TA-GCCC-TTATT---AAGC-G-CAGCA-CTGAAAA--TGCTA-AATT-ACC-CCA---ACT--TCATAACA     |
| 7. Hydrophis ornatus(1)        | LC648430         | GTTATC-A-TA-GCCC-TTATT---AAGC-G-CAGCA-CTGAAAA--TGCTA-AATT-ACC-CCA---CCT--TATTAAACA    |
| 8. Hydrophis ornatus(2)        | LC648430         | GTTATC-A-TA-GCCC-TTATT---AAGC-G-CAGCA-CTGAAAA--TGCTA-AATC-ACC-CTA---ACT--TTATAACA     |
| 9. Hydrophis ornatus(3)        | LC648430         | GTTATC-A-TA-GCCC-TTATT---AAGC-G-CAGCA-CTGAAAA--TGCTA-AATC-ACC-CTA---ACT--TTATAACA     |
| 10. Hydrophis cyanocinctus     | NC046795         | GTTATC-A-TA-GCTT-ACAACC---AAGC-A-YAGCA-CTGAAAWN-TGCTA-AAAC-GGT-CTT---ACC--TGATAACA    |
| 11. Hydrophis platurus         | MK775530         | GTTATC-A-TA-GCCC-TTATT---AAGC-A-TAGCA-CTGAAAA--TGCTA-AATT-ACC-CC---AAT--TTATAACA      |
| 12. Hydrophis curtus           | MK953549         | GTTATC-A-TA-GCTT-ACAACC---AAGC-A-CAGCA-CTGAAAA--TGCTA-AGAC-AGC-CCA---ACT--TTATAACA    |
| 13. Emydocephalus ijimae       | LC648431         | GTTATC-A-TA-GCTT-ACAACC---AAGC-A-TAGCA-CTGAAAA--TGCTA-AGAC-GGC-CCC---ACC--TAATAACA    |
| 14. Laticauda semifasciata     | KY496325         | GTTATT-A-TA-GCTT-ATAATC---AAGC-A-TAGCA-CTGAAAA--TGCTA-AGAT-GGT-CTAC---TCC--TGATAACA   |
| 15. Laticauda colubrina        | KY496324         | GTTGTC-A-TA-GCTT-AAAATC---AAGC-A-TAGCA-CTGAAAA--TGCTA-AGAT-GGC-CCAC---TCC--TGATAACA   |
| 16. Laticauda laticaudata      | KY496323         | GTTATT-A-TA-GCTT-ATATC---AAGC-A-TAGCA-CTGAAAA--TGCTA-AGAT-GGT-CCAC---CCC--TAGTAACA    |
| 17. Sinomicrurus japonicus     | LC648432         | GTTATC-A-TA-GCTT-ACCTTC---AAGC-A-TAGCA-CTGAAAA--TGCTA-AGAC-GGC-CTA---CCC--TGATAACA    |
| 18. Sinomicrurus peianii       | MZ230594         | GTTATC-A-TA-GCTT-ACCTTC---AAGC-A-TAGCA-CTGAAAA--TGCTA-AGAC-GGC-CCT---ACC--TGATAACA    |
| 19. Sinomicrurus mecklelandi   | MT547176         | GTTATC-A-TA-GCTT-ACAATC---AAGC-A-TAGCA-CTGAAAA--TGCTA-AGAC-GGC-CTC---CCC--TGATAACA    |
| 20. Micrurus fulvius           | GU045453         | GCTATC-A-TA-GCTT-ACCTTC---AAGC-A-TAGCA-CTGAAAA--TGCTA-AGAC-GGC-CT---TCC--TGATAGCA     |
| 21. Ophiophagus hannah         | EU921899         | GTTATC-A-TA-GCTT-ACACTC---AAGC-A-TAGCA-CTGAAAA--TGCTA-AGAC-GGC-CCC---CCC--TGATAACA    |
| 22. Naja atra                  | EU913475         | GTTGTC-A-TA-GCTT-ACCTATC---AAGC-A-TAGCA-CTGAAAA--TGCTA-AGAC-GGC-CAAT---GCC--TGACAGCA  |
| 23. Bungarus multicinctus      | EU579522         | GT-ACG-G-TA-GCTT-ACGATTA---AAGC-A-TAGCA-CTGAAAA--TGCTA-AGAC-GGC-CTC---GCC--TGATAACA   |
| 24. Bungarus fasciatus         | EU579523         | GTTATT-A-TA-GCTT-ACCTATC---AAGC-A-TAGCA-CTGAAAA--TGCTA-AGAC-GGC-ATTC---ACC--TGATAACA  |
| 25. Sibon nebulatus            | NC013985         | GTTATC-A-TA-GCTT-ACCTATC---AAGC-G-TAGCA-CTGAAAA--TGCTA-AGAC-GGC-ACAGC-CTGA-TC--TAACA  |
| 26. Lycodon semicarinatus      | AB008539         | GTTATC-A-TA-GCTT-ACGAATTA---AAGC-A-TAGCA-CTGAAAA--TGCTA-AGAT-GGT-CTAC---ACC--TGATTTAA |
| 27. Oviphis okinavensis        | AB175670         | GTTGTCG-TA-GCTT-AAAGCTTA---AAGT-A-TAGCA-CTGAAAA--TGCTA-AGAT-GGT-CCA---ACC--CTCCAACA   |
| 28. Python regius              | AB177878         | GTTATT-G-TA-GCTT-ACACCA---AAGC-A-CAGCA-CTGAAAA--TGCTG-AGAC-GGT-ATTAC-ACCC-AAATAACA    |

Supplementary figure S5. Sequence comparison of tRNA<sup>Phe</sup> genes among 21 snake species based on their clover-leaf secondary structures. *Hydrophis ornatus* mtDNA encodes three copies of tRNA<sup>Phe</sup> genes (noted with 1-3) that correspond to F<sub>1</sub>-F<sub>3</sub> in Fig. 3, respectively. *Hrdrophis melanocephalus* mtDNA encodes six copies of tRNA<sup>Phe</sup> genes (noted with 1-6) that correspond to F<sub>1</sub>-F<sub>6</sub> in Fig. 3, respectively. The red line indicates the anticodon.





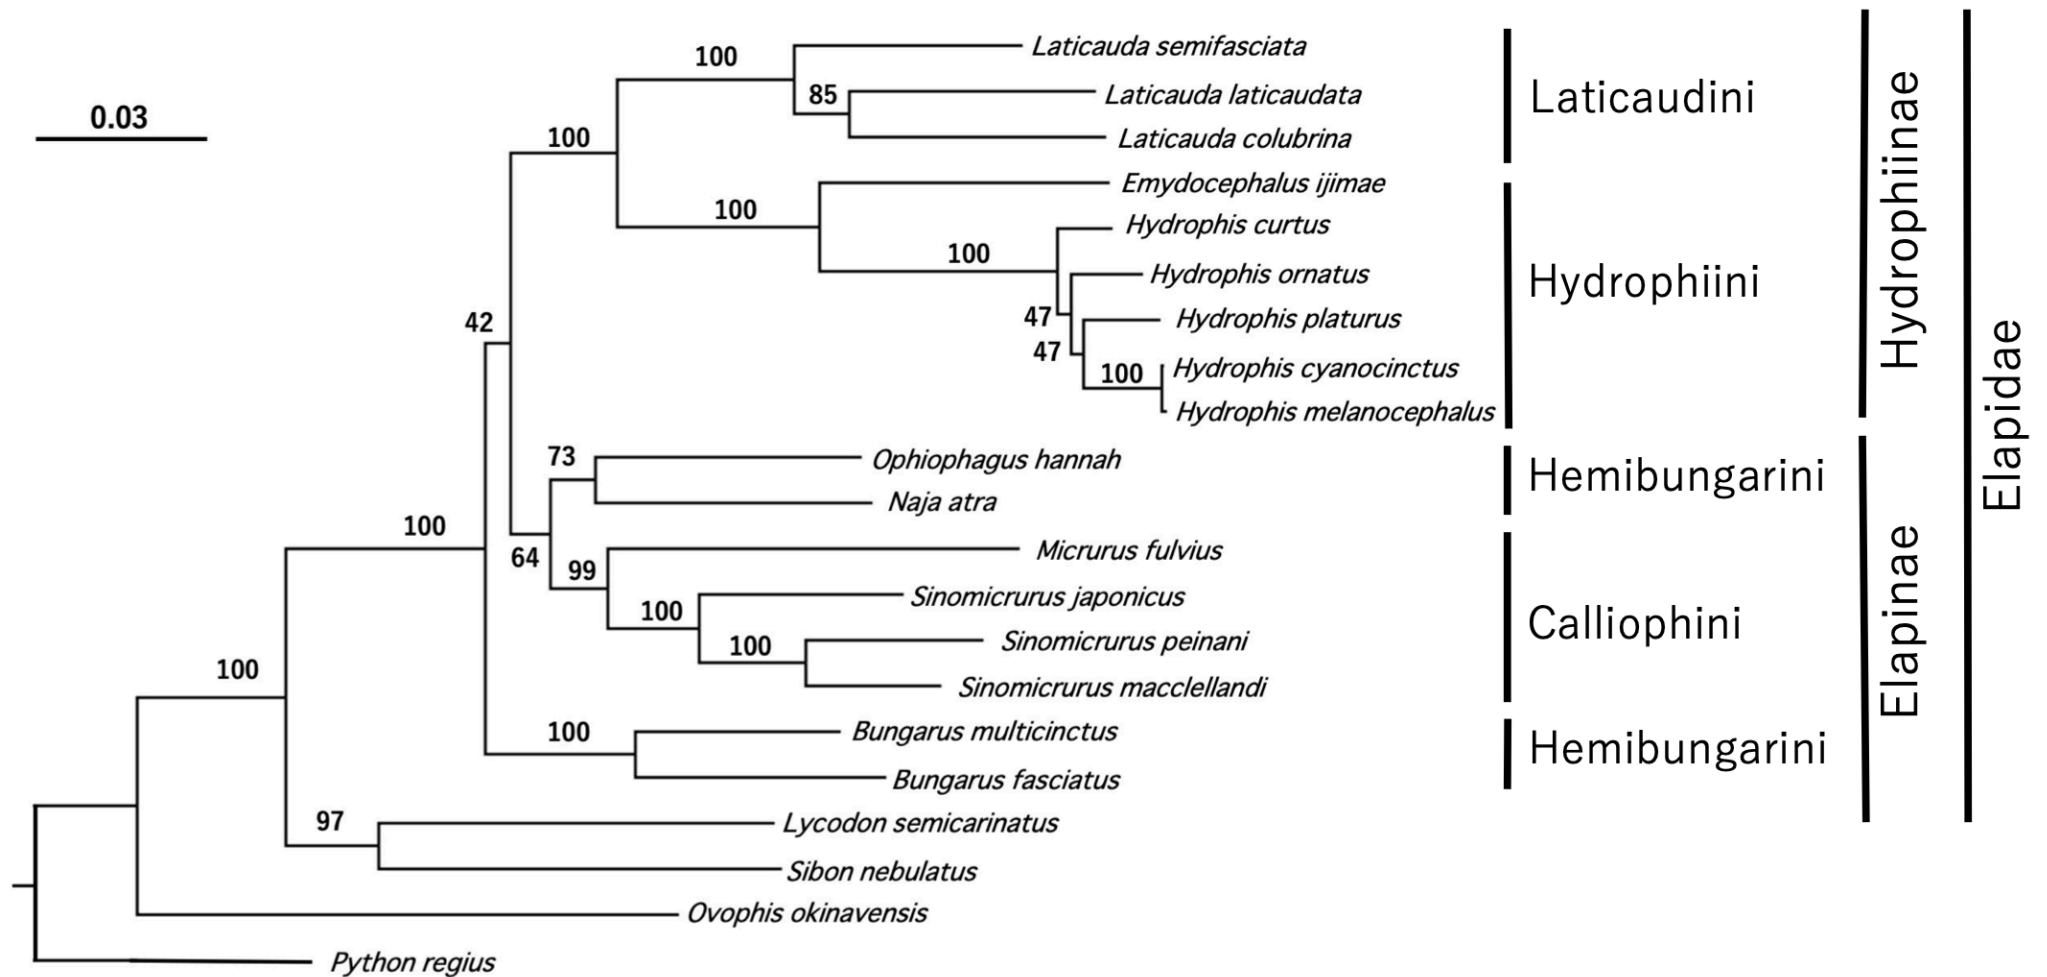

Supplementary figure S7. Maximum likelihood tree using amino acid sequences of 13 mitochondrial protein genes. Numbers at each node represent bootstrap probabilities from 5000 replications. Note that the monophyly of Hemibungarini is not seen in this tree and inter-species relationships within Hydrophiini in this tree are different from those in Fig. S6.
