# Supplementary material for: Evolution of the Noncoding Features of Sea Snake Mitochondrial Genomes within Elapidae
Source: Genes (Basel). 2022 Aug 17;13(8):1470. doi: 10.3390/genes13081470 (PMC9407768; doi:10.3390/genes13081470)
Supplement: Supplementary file 1 [file genes-13-01470-s001.zip › supplementary_tables.xlsx]

## Sheet: Table S1
Table S1. PCR primers used to amplify MNCR regions and Nanopore sequence reads obtained
Scientific name	Target region	Forward primer Name: sequence (5'→3'): reference			Reverse primer Name: sequence (5'→3'): reference			PCR product length (kbp)	Nanopore reads
Emydocephalus ijimae	MNCR1	L4160m: CGATTCCGATATGACCARCT: (1)			H4433: AACCAACATTTTCGGGGTAT: (2)			3.1	205076
	MNCR2	uThr-1L: AAAGCATTGGTCTTGTAARCC: (3)			H690: GTTGAGGCTTGCATGTATA: (4)			3.3	325946
Hydrophis ornatus	MNCR1	L4160m: CGATTCCGATATGACCARCT: (1)			rMet-2H: GGTATGGGCCCRAWAGCTT: (5)			3	208543
	MNCR2	uThr-1L: AAAGCATTGGTCTTGTAARCC: (3)			H1858: TCGATTATAGRACAGGCTCCTCTAG: (6)			2.4	172177
Hydrophis melanocephalus	MNCR1	L4160m: CGATTCCGATATGACCARCT: (1)			rMet-2H: GGTATGGGCCCRAWAGCTT: (5)			8.6	461688
	MNCR2	uThr-1L: AAAGCATTGGTCTTGTAARCC: (3)			H1858: TCGATTATAGRACAGGCTCCTCTAG: (6)			2.8 & 3.4*	118,334 &100,853*
Sinomicrurus japonicus	MNCR1	L4160m: CGATTCCGATATGACCARCT: (1)			H4433: AACCAACATTTTCGGGGTAT: (2)			1.4	–
	MNCR2	uThr-1L: AAAGCATTGGTCTTGTAARCC: (3)			H1858: TCGATTATAGRACAGGCTCCTCTAG: (6)			1.7	–
	tRNACys-tRNATyr boundary	Cjapb-5L: CACTACATTTGTAGCGG: this study			uCO1-4H: GGKAGKAGTCARAAGCTTAT: this study			4.7	477431
* Shorter and longer amplified bands, respectively
(1) Kumazawa and Nishida (1993) J. Mol. Evol. 37: 380-398.
(2) Kumazawa and Nishida (1995) Mol. Biol. Evol. 12: 759-772.
(3) Dong and Kumazawa (2005) J. Mol. Evol. 61: 12-22.
(4) Kumazawa et al. (1996) Mol. Biol. Evol. 13: 1242-1254.
(5) Kumazawa and Endo (2004) DNA Res. 11: 115-125.
(6) Sorenson et al. (1999) Mol. Phylogenet. Evol. 12: 105-114.

## Sheet: Table S2
Table S2. Long PCR primers used to amplify mtDNA regions for Illumina sequencing
Scientific name	Target region	Forward primer Name: sequence（5'→3')				Reverse primer Name: sequence（5'→3')				PCR product length (kbp)	Illumina reads
Emydocephalus ijimae	tRNAPhe - tRNAIle	EIJ-1La: TAACCAGTGGCCTCTTAAAGAGCACTGT				EIJ-1Ha: CCATTAGGGCTGAAATCTAAACCTGGTT				3.5	293416
	tRNALeu - tRNApro	EIJ-2La: CATTAAGGTAGCACAGCTTGGCCGTGCA				EIJ-2Ha: CCGTGAAAAGCAGGACTGTATGCCTGAA				12.7
Hydrophis ornatus	tRNAPhe - tRNAIle	HOR-1La: CCCCATTAGGAACGGGATAGTCATGAGT				HOR-1Ha: TAGGCCATGAGCGCAAGCTTGACCTAAT				3.6	347586
	tRNALeu - tRNApro	HOR-2La: TAATTAAGGTAGCACAGCTAGGCCGTGC				HOR-2Ha: AAGGGCTGTGATAACACGCTGCACGATT				12.1
Hydrophis melanocephalus	tRNAPhe - tRNAIle	Hmel-1La: ATGGCCGTGAAAAGCAGGACTGTATGCC				Hmel-1Ha: ATCATAGCCCTTATTAAGCGCAGCACTG				3.9	194644
	tRNALeu - tRNApro	Hmel-2La: TAATTAAGGTAGCACAACTAGGCCGTGC				Hmel-2Ha: AAGGGCTGTGATAACACGCTGCACGATT				11
Sinomicrurus japonicus	tRNAPhe - tRNAIle	Cjapb-1La: GGGTTCCGTATCTACTCTATCAAGGTAG				Cjapb-1Ha: GGCCTACCCTGATAACACAAGGTCTTGG				3.4	476978
	tRNALeu - CO3	Cjapb-a: CAGACAGTGTGTACGGCTCCTTATTC				Cjapb-b: GAATAAGGAGCCGTACACACTGTCTG				9.5
	CO3 - tRNAPro	Cjapb-c: GTAGCAACAGGCTTTCACGGACTTC				Cjapb-d: ATGGGTAAGCTACTAGAGCAGTTAT				5.9

## Sheet: Table S3
	Table S3. Annotation of the mtDNA sequence of Emydocephalus ijimae
	Locus		From	To	Length (bp)	Intervening nucleotide (bp)	Strand	Codon
								Start	Stop
	tRNAPhe		1	62	62	0	+
	12S rRNA		63	994	932	0	+
	tRNAVal		995	1060	66	0	+
	16S rRNA		1061	2542	1482	0	+
	ND1		2543	3503	961	0	+	ATT	T--
	tRNAIle		3504	3569	66	0	+
	MNCR1		3570	6352	2783
		C-rich sequence	3590	3609	20
		coreTAS	3636	3650	15
		CSB-1	4223	4246	24
		CSB-3	4364	4381	18
	tRNALeu(UUR)		6353	6425	73	0	+
	tRNAGln		6426	6496	71	0	-
	tRNAMet		6497	6558	62	0	+
	ND2		6559	7588	1030	0	+	ATT	T--
	tRNATrp		7589	7655	67	0	+
	tRNAAla		7656	7722	67	45	-
	L-origin		7768	7807	40	39
	tRNAAsn		7847	7919	73	5	-
	tRNACys		7925	7986	62	0	-
	tRNATyr		7987	8049	63	1	-
	CO1		8051	9652	1602	-10	+	GTG	AGA
	tRNASer(UCN)		9643	9711	69	0	-
	tRNAAsp		9712	9774	63	2	+
	CO2		9777	10461	685	0	+	ATG	T--
	tRNALys		10462	10526	65	1	+
	AT8		10528	10692	165	-10	+	ATG	TAA
	AT6		10683	11362	680	0	+	ATG	TA-
	CO3		11363	12146	784	0	+	ATG	T--
	tRNAGly		12147	12208	62	0	+
	ND3		12209	12551	343	0	+	ATA	T--
	tRNAArg		12552	12615	64	0	+
	ND4L		12616	12905	290	0	+	ATG	TA-
	ND4		12906	14242	1337	0	+	ATG	TA-
	tRNAHis		14243	14307	65	0	+
	tRNASer(AGY)		14308	14364	57	-3	+
	tRNALeu(CUN)		14362	14432	71	2	+
	ND5		14435	16204	1770	-5	+	ATG	TAA
	ND6		16200	16703	504	0	-	ATG	AGA
	tRNAGlu		16704	16765	62	0	-
	cytb		16766	17882	1117	0	+	ATG	T--
	tRNAThr		17883	17948	66	0	+
	tRNAPro		17949	18012	64	0	-
	MNCR2		18013	20598	2586
		C-rich sequence	18033	18052	20
		coreTAS	18079	18093	15
		CSB-1	18666	18689	24
		CSB-3	18807	18824	18

## Sheet: Table S4
	Table S4. Annotation of the mtDNA sequence of Hydrophis ornatus
	Locus		From	To	Length (bp)	Intervening nucleotide (bp)	Strand	Codon
								Start	Stop
	tRNAPhe(3rd copy)		1	61	61	0	+
	12S rRNA		62	998	937	0	+
	tRNAVal		999	1064	66	0	+
	16S rRNA		1065	2540	1476	0	+
	ND1		2541	3501	961	0	+	ATC	T--
	tRNAIle		3502	3567	66	0	+
	MNCR1		3568	6300	2733
		C-rich sequence	3590	3605	16
		coreTAS	3635	3649	15
		CSB-1	4225	4248	24
		CSB-3	4366	4383	18
	tRNALeu(UUR)		6301	6373	73	0	+
	tRNAGln		6374	6444	71	0	-
	tRNAMet		6445	6506	62	0	+
	ND2		6507	7536	1030	0	+	ATT	T--
	tRNATrp		7537	7602	66	1	+
	tRNAAla		7604	7670	67	27	-
	L-origin		7698	7733	36	83
	tRNAAsn		7817	7889	73	14	-
	tRNACys		7904	7964	61	0	-
	tRNATyr		7965	8027	63	1	-
	CO1		8029	9630	1602	-10	+	GTG	AGA
	tRNASer(UCN)		9621	9688	68	0	-
	tRNAAsp		9689	9752	64	2	+
	CO2		9755	10439	685	0	+	ATG	T--
	tRNALys		10440	10503	64	0	+
	AT8		10504	10668	165	-10	+	ATG	TAA
	AT6		10659	11338	680	0	+	ATG	TA-
	CO3		11339	12122	784	0	+	ATG	T--
	tRNAGly		12123	12184	62	0	+
	ND3		12185	12527	343	0	+	ATA	T--
	tRNAArg		12528	12592	65	0	+
	ND4L		12593	12882	290	0	+	ATG	TA-
	ND4		12883	14219	1337	0	+	ATG	TA-
	tRNAHis		14220	14284	65	1	+
	tRNASer(AGY)		14286	14342	57	-3	+
	tRNALeu(CUN)		14340	14410	71	2	+
	ND5		14413	16182	1770	-5	+	ATG	TAA
	ND6		16178	16675	498	6	-	ATA	AGA
	tRNAGlu		16682	16743	62	0	-
	cytb		16744	17860	1117	0	+	ATG	T--
	tRNAThr		17861	17927	67	0	+
	tRNAPro		17928	17990	63	0	-
	MNCR2		17991	19682	1692
	tRNAPhe(1st copy)		18406	18466	61		+
	tRNAPhe(2nd copy)		19044	19104	61		+

## Sheet: Table S5
	Table S5. Annotation of the mtDNA sequence of Hydrophis melanocephalus
	Locus		From	To	Length (bp)	Intervening nucleotide (bp)	Strand	Codon
								Start	Stop
	tRNAPhe(6th copy)		1	62	62	0	+
	12S rRNA		63	1004	942	0	+
	tRNAVal		1005	1070	66	0	+
	16S rRNA		1071	2550	1480	0	+
	ND1		2551	3511	961	0	+	ATC	T--
	tRNAIle(1st copy)		3512	3576	65	0	+
	MNCR1		3577	11906	8330
		C-rich sequence	3600	3613	14
		coreTAS	3644	3658	15
		CSB-1	4232	4255	24
		CSB-3	4374	4391	18
	tRNAPhe(1st copy)		7287	7348	62		+
	tRNAIle(2nd copy)		7724	7790	67		+
		C-rich sequence	7812	7823	12
		coreTAS	7854	7868	15
		CSB-1	8442	8465	24
		CSB-3	8584	8601	18
	tRNALeu(UUR)		11907	11979	73	0	+
	tRNAGln		11980	12050	71	0	-
	tRNAMet		12051	12112	62	0	+
	ND2		12113	13142	1030	0	+	ATT	T--
	tRNATrp		13143	13209	67	1	+
	tRNAAla		13211	13277	67	27	-
	L-origin		13305	13338	34	77
	tRNAAsn		13416	13488	73	13	-
	tRNACys		13502	13562	61	0	-
	tRNATyr		13563	13625	63	1	-
	CO1		13627	15228	1602	-10	+	GTG	AGA
	tRNASer(UCN)		15219	15286	68	0	-
	tRNAAsp		15287	15350	64	2	+
	CO2		15353	16037	685	0	+	ATG	T--
	tRNALys		16038	16100	63	0	+
	AT8		16101	16265	165	-10	+	ATG	TAA
	AT6		16256	16936	681	-1	+	ATG	TAA
	CO3		16936	17719	784	0	+	ATG	T--
	tRNAGly		17720	17781	62	0	+
	ND3		17782	18124	343	0	+	ATA	T--
	tRNAArg		18125	18188	64	0	+
	ND4L		18189	18479	291	-1	+	ATG	TAA
	ND4		18479	19816	1338	0	+	ATG	TAG
	tRNAHis		19817	19879	63	1	+
	tRNASer(AGY)		19881	19937	57	-3	+
	tRNALeu(CUN)		19935	20005	71	2	+
	ND5		20008	21777	1770	-5	+	ATG	TAA
	ND6		21773	22279	507	-3	-	ATA	AGA
	tRNAGlu		22277	22338	62	0	-
	cytb		22339	23455	1117	0	+	ATG	T--
	tRNAThr		23456	23526	71	0	+
	tRNAPro		23527	23589	63	0	-
	MNCR2		23590	26316	2727
	tRNAPhe(2nd copy)		23985	24045	61		+
	tRNAPhe(3rd copy)		24569	24629	61		+
	tRNAPhe(4th copy)		25735	25795	61		+
	tRNAPhe(5th copy)		25735	25795	61		+

## Sheet: Table S6
	Table S6. Annotation of the mtDNA sequence of Sinomicrurus japonicus
	Locus		From	To	Length (bp)	Intervening nucleotide (bp)	Strand	Codon
								Start	Stop
	tRNAPhe		1	62	62	0	+
	12S rRNA		63	991	929	0	+
	tRNAVal		992	1056	65	0	+
	16S rRNA		1057	2525	1469	0	+
	ND1		2526	3486	961	0	+	ATC	T--
	tRNAIle		3487	3553	67	0	+
	MNCR1		3554	4581	1028
		C-rich sequence	3574	3589	16
		coreTAS	3619	3633	15
		CSB-1	4205	4227	23
		CSB-3	4344	4361	18
	tRNALeu(UUR)		4382	4654	273	0	+
	tRNAGln		4655	4725	71	0	-
	tRNAMet		4726	4787	62	0	+
	ND2		4788	5817	1030	0	+	ATC	T--
	tRNATrp		5818	5882	65	3	+
	tRNAAla		5886	5951	66	0	-
	tRNAAsn		5952	6024	73	2	-
	L-origin		6027	6064	38	-3
	tRNACys		6062	6122	61	0	-
	repeat region		6123	10544	4422	0
	tRNATyr		10545	10607	63	1	-
	CO1		10609	12210	1602	-10	+	GTG	AGG
	tRNASer(UCN)		12201	12268	68	0	-
	tRNAAsp		12269	12332	64	1	+
	CO2		12334	13018	685	0	+	ATG	T--
	tRNALys		13019	13082	64	1	+
	AT8		13084	13248	165	-10	+	ATG	TAA
	AT6		13239	13918	680	0	+	ATG	TA-
	CO3		13919	14702	784	0	+	ATG	T--
	tRNAGly		14703	14763	61	0	+
	ND3		14764	15106	343	0	+	ATT	T--
	tRNAArg		15107	15172	66	0	+
	ND4L		15173	15462	290	0	+	GTG	TAA
	ND4		15463	16799	1337	0	+	ATG	TA-
	tRNAHis		16800	16862	63	1	+
	tRNASer(AGY)		16864	16921	58	-3	+
	tRNALeu(CUN)		16919	16989	71	1	+
	ND5		16991	18769	1779	-5	+	ATG	T--
	ND6		18765	19265	501	0	-	ATG	AGG
	tRNAGlu		19266	19329	64	0	-
	cytb		19330	20446	1117	0	+	ATG	T--
	tRNAThr		20447	20512	66	0	+
	tRNAPro		20513	20573	61	0	-
	MNCR2		20574	21581	1008
		C-rich sequence	20596	20611	16
		coreTAS	20641	20655	15
		CSB-1	21228	21250	23
		CSB-3	21367	21384	18

## Sheet: Table S7
	Table S7. Comparison of two major noncoding regions between different species and different INSD sequence entries of sea snakes
	Scientific name	MNCR1						MNCR2					mtDNA accession No.	Reference
		length (bp)	C-rich	CSB1	CSB3	tandem repeats		length (bp)	C-rich	CSB1	CSB3	tandem repeats
	Emydocephalus ijimae	2783	Yes	Yes	Yes	10 repeats (190bp unit)		2586	Yes	Yes	Yes	8 repeats (190bp unit)	LC648431	this study
	Emydocephalus ijimae	1383	Yes	Yes	Yes	No repeat		1646	Yes	Yes	Yes	No repeat	MK775531	Yi et al., Mitochondrial DNA Part B 4: 2658-2659 (2019)
	Hydrophis ornatus	2733	Yes	Yes	Yes	8 repeats (197bp unit)		1692	No	No	No	3 repeats (638bp unit)	LC648430	this study
	Hydrophis melanocephalus	8330	Yes*	Yes*	Yes*	27 repeats (198bp unit)		2727	No	No	No	5 repeats (592bp unit)	LC648429	this study
	Hydrophis melanocephalus	1548	Yes	Yes	Yes	2 repeats (198bp unit)		385	No	No	No	No repeat	MK775532	Yi et al., Mitochondrial DNA Part B 5:1406-1407 (2020)
	Hydrophis curtus	1152	Yes	Yes	Yes	No repeat		1324	No	No	No	No repeat	MK953549	Qiu et al., Mitochondrial DNA part B 4: 3628-3629 (2019)
	Hydrophis platurus	1759	Yes	Yes	Yes	4 repeats (199bp unit)		1088	No	No	No	No repeat	MK775530	Kim et al., Mitochondrial DNA part B 5: 891-892 (2020)
	Hydrophis cyanocinctus	1123	Yes	Yes	Yes	No repeat		1309	No	No	No	No repeat	MK953550	Qiu et al., Mitochondrial DNA part B 4: 2328-2329 (2019)
	Laticauda semifasciata	259	No	No	No	No repeat		1774	Yes	Yes	Yes	4 repeats (253bp unit)	KY496325	Kim et al., Mitochondirial DNA part A 29: 772–777 (2018)
	Laticauda colubrina	1408	Yes	Yes	Yes	2 repeats (241bp unit)		920	Yes	Yes	Yes	No repeat	KY496324	Kim et al., Mitochondirial DNA part A 29: 772–777 (2018)
	Laticauda laticaudata	910	Yes	Yes	Yes	No repeat		1185	No	No	No	No repeat	KY496323	Kim et al., Mitochondirial DNA part A 29: 772–777 (2018)
	*The MNCR1 region of H. melanocephalus (LC648429) contains duplicate control regions in it

## Sheet: Table S8
	Table S8. Twenty one snake species for which mtDNA sequences were compared in this study
	No.	Scientific name	Family	mtDNA accession No.	Length (bp)	Reference
	1	Emydocephalus ijimae	Elapidae	LC648431	20598	this study
	2	Hydrophis ornatus	Elapidae	LC648430	19682	this study
	3	Hydrophis melanocephalus	Elapidae	LC648429	26316	this study
	4	Hydrophis curtus	Elapidae	MK953549	17702	Qiu et al., Mitochondrial DNA part B 4: 3628-3629 (2019)
	5	Hydrophis platurus	Elapidae	MK775530	18101	Kim et al., Mitochondrial DNA part B 5:891-892 (2020)
	6	Hydrophis cyanocinctus	Elapidae	MK953550	17750	Qiu et al., Mitochondrial DNA part B 4: 2328-2329 (2019)
	7	Laticauda semifasciata	Elapidae	KY496325	17170	Kim et al., Mitochondirial DNA part A 29: 772–777 (2018)
	8	Laticauda colubrina	Elapidae	KY496324	17450	Kim et al., Mitochondirial DNA part A 29: 772–777 (2018)
	9	Laticauda laticaudata	Elapidae	KY496323	17209	Kim et al., Mitochondirial DNA part A 29: 772–777 (2018)
	10	Sinomicrurus japonicus	Elapidae	LC648432	21581	this study
	11	Sinomicrurus peinani	Elapidae	MZ230594	19477	Zhou, direct submission
	12	Sinomicrurus macclellandi	Elapidae	MT547176	17120	Yao et al., Mitochondrial DNA part B 5: 2582-2584 (2020)
	13	Micrurus fulvius	Elapidae	GU045453	17506	Castoe et al., Cytogenet. Genome Res. 127: 112-127 (2009)
	14	Ophiophagus hannah	Elapidae	EU921899	17267	Chen and Lai, Yi Chuan. 32: 719-725 (2010)
	15	Naja atra	Elapidae	EU913475	17216	Chen, direct submission
	16	Bungarus fasciatus	Elapidae	EU579523	17234	Chen et al., direct submission
	17	Bungarus multicinctus	Elapidae	EU579522	17144	Chen et al., direct submission
	18	Lycodon semicarinatus	Colubridae	AB008539	17191	Kumazawa et al., Genetics 150: 313-329 (1998)
	19	Sibon nebulatus	Colubridae	EU728583	22887	Mulcahy and Mecey, Mol. Phylogenet. Evol. 53: 537-546 (2009)
	20	Ovophis okinavensis	Viperidae	AB175670	17388	Dong and Kumazawa, J. Mol. Evol. 61: 12-22 (2005)
	21	Python regius	Pythonidae	AB177878	17245	Dong and Kumazawa, J. Mol. Evol. 61: 12-22 (2005)
